# Supplementary material for: Cuprous thiocyanate as an inorganic hole transport material for carbon-based flexible perovskite solar cells
Source: Royal Society of Chemistry journal article supplement (doi:10.1039/d4se01222d), 2025-01-01
Supplement: d4se01222d1.pdf [file d4se01222d1.pdf]

## Supporting information

### **Cuprous thiocyanate as Inorganic Hole Transport Material for Carbon Based Flexible Perovskite Solar Cells.**

Samyuktha Noola<sup>1</sup>, Gyanendra Shankar<sup>2</sup>, Francesca De Rossi<sup>2\*</sup>, Emanuele Calabrò<sup>3</sup>, Matteo Bonomo<sup>1</sup>, Claudia Barolo<sup>1,4,5</sup>, Francesca Brunetti<sup>2</sup>

*1. Department of Chemistry, NIS Interdepartmental Centre and INSTM Reference Centre, Università Degli Studi di Torino, Via Pietro Giuria 7, 10125, Torino, Italy.*

*2. CHOSE, Department of Electronic Engineering, University of Rome Tor Vergata 00133, Italy.*

*3. Halocell Europe, Viale Castro Pretorio 122, Rome, 00185, Italy.*

*4. ICxT Interdepartmental Centre, Università degli Studi di Torino, Lungo Dora Siena 100, 10153 Torino, Italy.*

*5. Istituto di Scienza, Tecnologia e Sostenibilità per lo Sviluppo dei Materiali Ceramici (ISSMC-CNR), Via Granarolo 64, Faenza, RA 48018, Italy.*

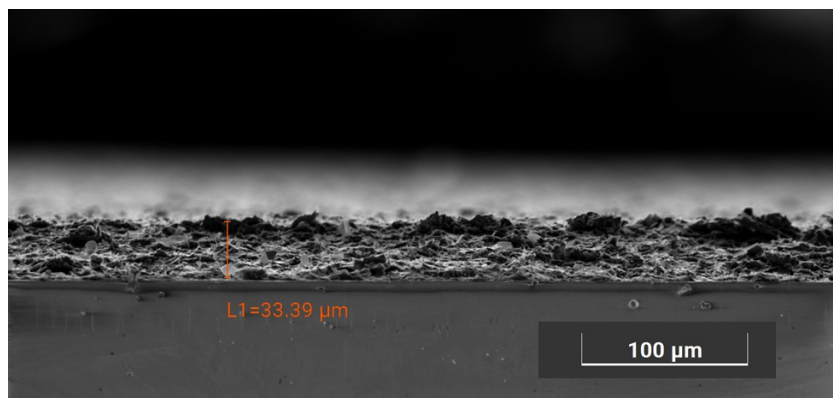

**Figure S1:** Cross-section SEM image showing the dry film thickness of the carbon top electrode.

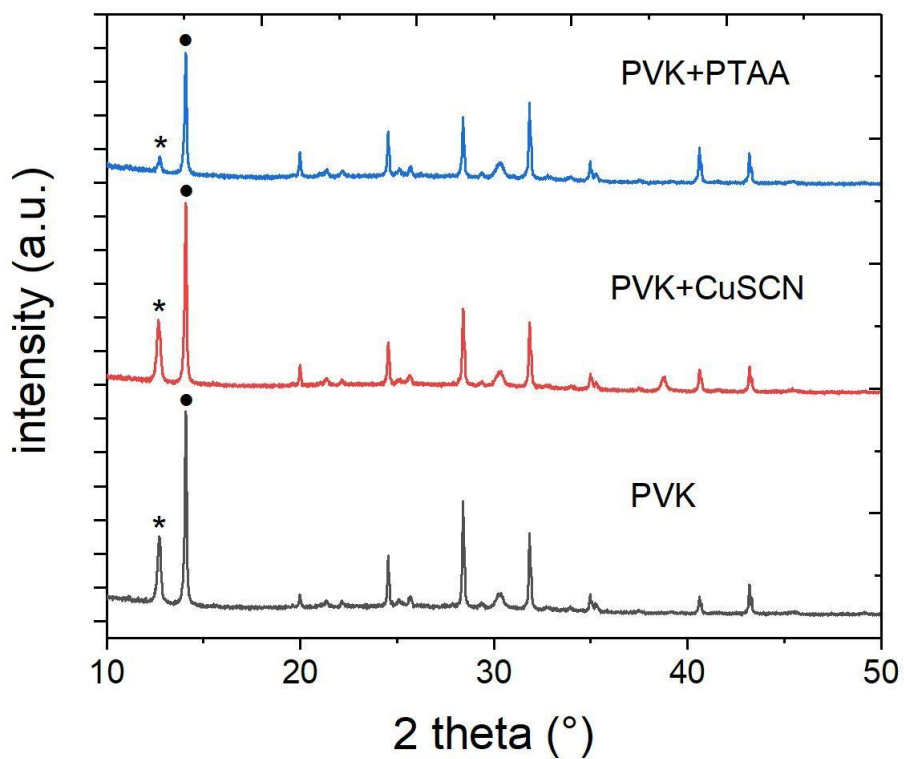

**Figure S2:** XRD diffraction patterns of the perovskite film (black), the perovskite film covered by the CuSCN layer (10 mg/ml, red), the perovskite film covered by the PTAA layer (12 mg/ml, blue), all deposited on glass/ ITO/ SnO<sub>2</sub>. Asterisks and solid dots indicate the 12.6° PbI<sub>2</sub> and 14.1° perovskite peaks.

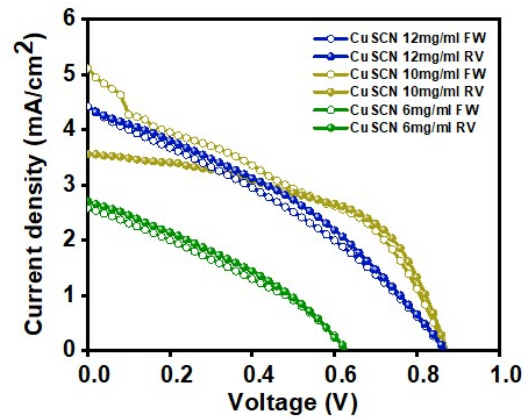

**Figure S3:** JV curves of F-PSCs with CuSCN at different concentrations using a gold top electrode.

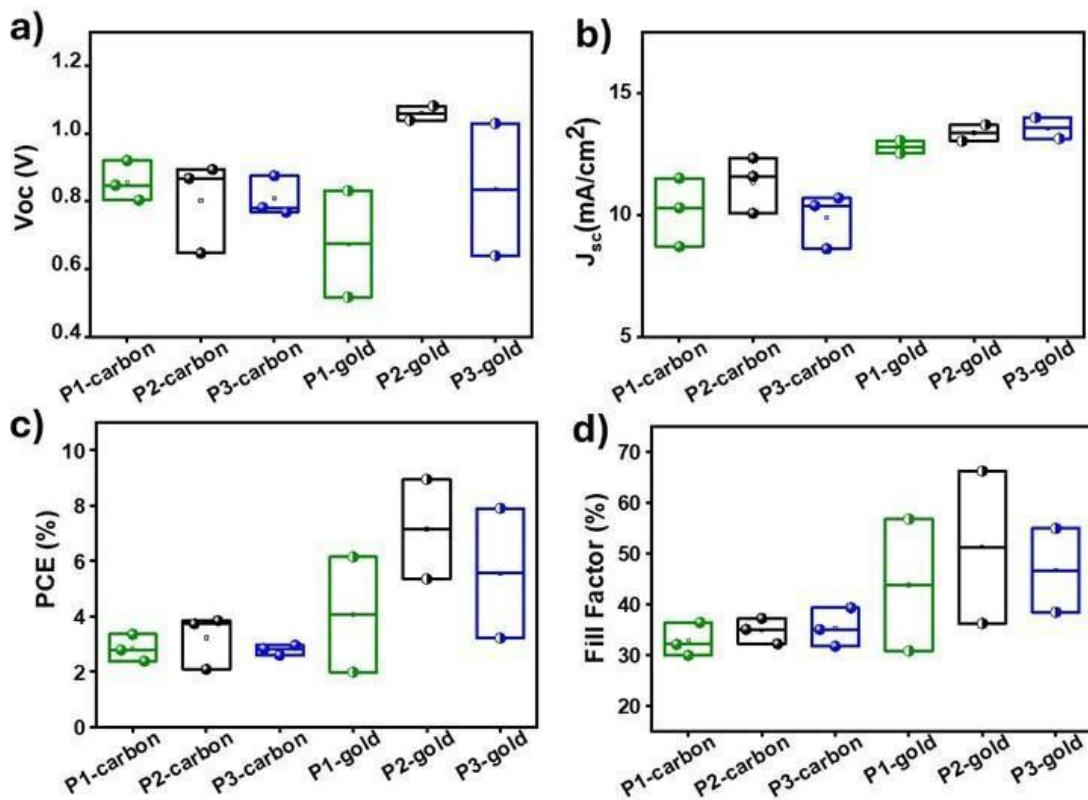

**Figure S4.** Photovoltaic parameters of flexible perovskite solar cells (PSCs) with an active area of  $1 \text{ cm}^2$  using different concentrations namely P1= 6 mg/ml, P2= 12 mg/ml, P3= 18 mg/ml of commercially available PTAA (MW= 105 kDa) with carbon and gold top electrode, measured under standard test conditions (STC, AM1.5G,  $1000 \text{ W/m}^2$ ,  $25 \text{ }^\circ\text{C}$ ).

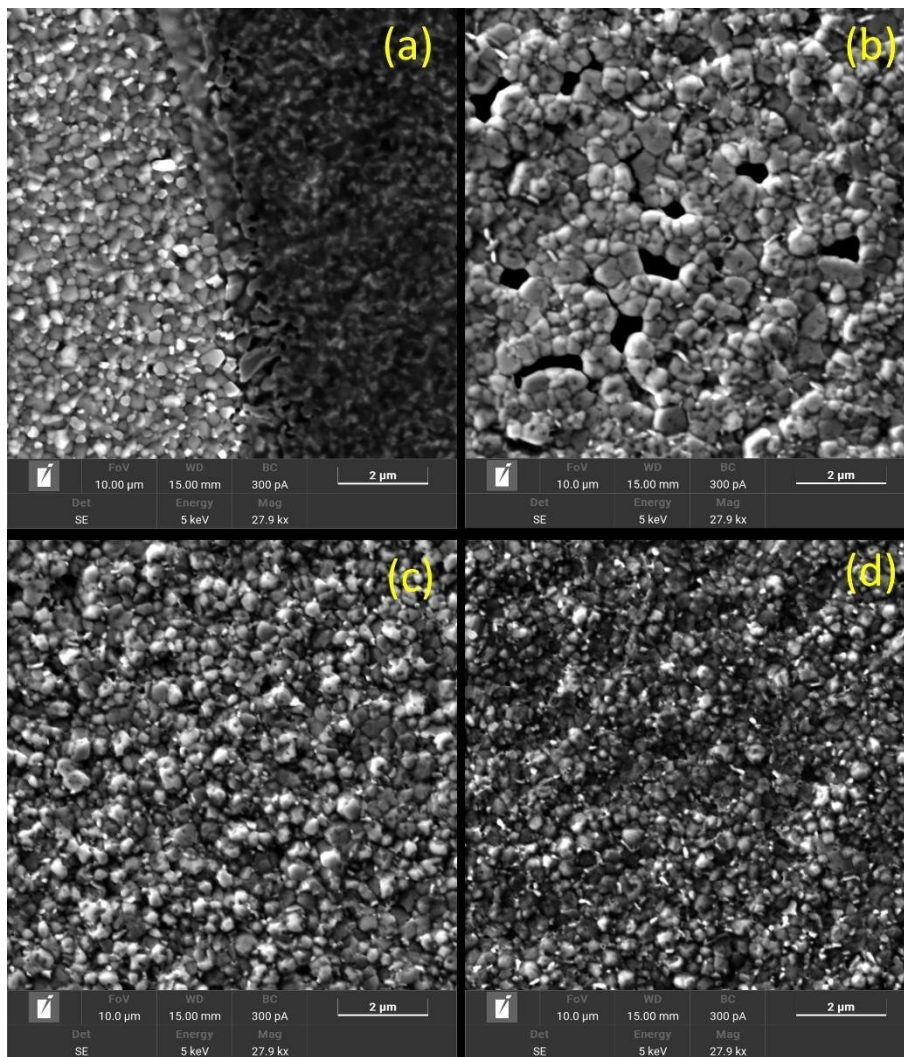

**Figure S5.** The top-view SEM images of: (a) the perovskite film partially covered by the PTAA layer, and the CuSCN layers at different concentrations: (b) 6 mg/ml, (c) 10 mg/ml, and (d) 12 mg/ml.

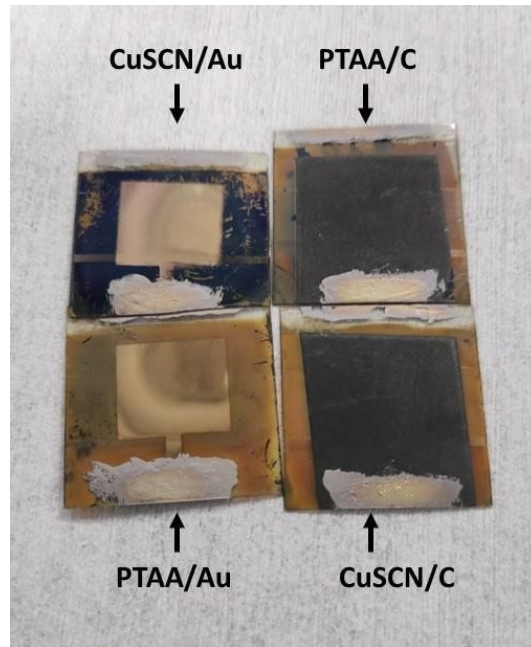

Figure S6: After one week of thermal stress ISOS T-1

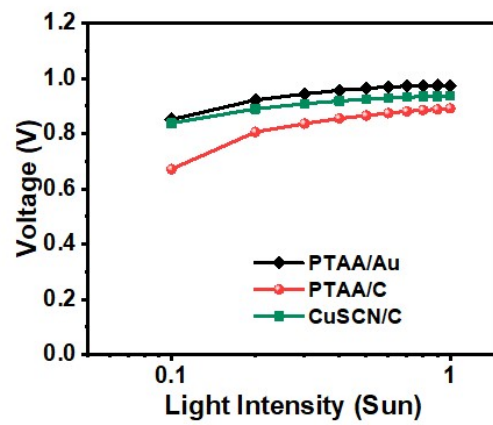

Figure S7:  $V_{oc}$  at different sun intensities.

**Table S1:** PV parameters of F-PSCs with CuSCN at different concentrations with gold top

| concentration (mg/ml) | Scan | $V_{oc}(V)$    | $J_{sc}(mA/cm^2)$ | Fill factor (%) | PCE (%)        |
|-----------------------|------|----------------|-------------------|-----------------|----------------|
| 6                     | FW   | $0.53\pm 0.06$ | $12.1\pm 0.28$    | $31.0\pm 2.80$  | $2.01\pm 0.46$ |
|                       | RV   | $0.67\pm 0.22$ | $12.7\pm 0.36$    | $43.7\pm 18.3$  | $4.06\pm 2.93$ |
| 12                    | FW   | $1.05\pm 0.03$ | $14.2\pm 1.51$    | $48.0\pm 19.1$  | $7.07\pm 1.88$ |
|                       | RV   | $1.05\pm 0.02$ | $13.3\pm 0.46$    | $51.0\pm 21.1$  | $7.14\pm 2.54$ |
| 18                    | FW   | $0.83\pm 0.27$ | $13.1\pm 0.52$    | $42.6\pm 12.1$  | $4.95\pm 3.07$ |
|                       | RV   | $0.83\pm 0.27$ | $13.5\pm 0.60$    | $46.6\pm 11.6$  | $5.56\pm 3.30$ |

electrode.

**Table S2:** Statistical data of Photovoltaic (PV) parameters of Gold F-PSCs employed with PTAA at three different concentrations.

| Concentration CuSCN | Scan | $V_{oc}(V)$ | $J_{sc}(mA/cm^2)$ | Fill factor (%) | PCE (%) |
|---------------------|------|-------------|-------------------|-----------------|---------|
| 6 mg/ml             | FW   | 0.62        | 2.57              | 31.98           | 0.52    |
|                     | RV   | 0.63        | 2.68              | 33.7            | 0.57    |
| 10 mg/ml            | FW   | 0.86        | 5.10              | 35.85           | 1.58    |
|                     | RV   | 0.87        | 3.54              | 52.8            | 1.63    |
| 12 mg/ml            | FW   | 0.86        | 4.41              | 32.67           | 1.25    |
|                     | RV   | 0.87        | 4.37              | 35.82           | 1.36    |

**Table S3:** Statistical data of Photovoltaic (PV) parameters of Carbon F-PSCs employed with PTAA at three different concentrations.

| concentration (mg/ml) | Scan | $V_{oc}(V)$    | $J_{sc}(mA/cm^2)$ | Fill factor (%) | PCE (%)        |
|-----------------------|------|----------------|-------------------|-----------------|----------------|
| 6                     | FW   | $0.86\pm 0.05$ | $9.90\pm 1.38$    | $32.2\pm 1.81$  | $2.7\pm 0.34$  |
|                       | RV   | $0.85\pm 0.05$ | $10.15\pm 1.40$   | $32.7\pm 3.28$  | $2.84\pm 0.48$ |
| 12                    | FW   | $0.80\pm 0.13$ | $11.31\pm 0.32$   | $34.3\pm 4.58$  | $3.19\pm 0.97$ |
|                       | RV   | $0.8\pm 0.13$  | $11.31\pm 2.52$   | $34.7\pm 2.52$  | $3.22\pm 0.98$ |
| 18                    | FW   | $0.80\pm 0.05$ | $9.96\pm 1.05$    | $35.9\pm 4.32$  | $2.88\pm 0.43$ |
|                       | RV   | $0.80\pm 0.05$ | $9.88\pm 1.12$    | $35.2\pm 3.79$  | $2.79\pm 0.18$ |

**Table S4:** Fitting parameters of EIS.

|                | PTAA/C   | CuSCN/C  |
|----------------|----------|----------|
| Chi-Sqr        | 0.009032 | 0.033705 |
| Sum-Sqr        | 0.71354  | 2.7975   |
| R1( $\Omega$ ) | 64.12    | 34.09    |

|                             |          |          |
|-----------------------------|----------|----------|
| R1(Error)                   | 1.6159   | 2.7722   |
| R1(Error%)                  | 2.5201   | 8.132    |
| R2( $\Omega$ )              | 1253     | 1860     |
| R2(Error)                   | 75.747   | 83.729   |
| R2(Error%)                  | 6.0453   | 4.5016   |
| CPE2-T(F.cm <sup>-2</sup> ) | 1.52E-07 | 2.77E-07 |
| CPE2-T(Error)               | 2.03E-08 | 4.53E-08 |
| CPE2-T(Error%)              | 13.338   | 16.346   |
| CPE2-P                      | 0.92906  | 0.82475  |
| CPE2-P(Error)               | 0.014868 | 0.014524 |
| CPE2-P(Error%)              | 1.6003   | 1.761    |
| R3( $\Omega$ )              | 478.6    | 349.9    |
| R3(Error)                   | 105.55   | 149.22   |
| R3(Error%)                  | 22.054   | 42.646   |
| CPE3-T(F.cm <sup>-2</sup> ) | 4.04E-05 | 5.79E-05 |
| CPE3-T(Error)               | 2.19E-05 | 8.27E-05 |
| CPE3-T(Error%)              | 54.21    | 142.86   |
| CPE3-P                      | 0.73677  | 0.88414  |
| CPE3-P(Error)               | 0.15013  | 0.36845  |
| CPE3-P(Error%)              | 20.377   | 41.673   |

#### References:

1. Dong, H., Ran, C., Gao, W. *et al.* Metal Halide Perovskite for next-generation optoelectronics: progresses and prospects. *eLight* **3**, 3 (2023).
2. Haeger, T., Heiderhoff, R. & Riedl, T. Thermal properties of metal-halide perovskites. *J. Mater. Chem. C* **8**, 14289–14311 (2020).
